# Supplementary material for: Validation of blood vitamin A concentrations in cattle: comparison of a new cow-side test (iCheck™ FLUORO) with high-performance liquid chromatography (HPLC)
Source: PubMed Central journal article supplement (PMC5424361; doi:10.1186/s12917-017-1042-3), 2017-05-10
Supplement: 12917_2017_1042_MOESM1_ESM.pdf [file 12917_2017_1042_MOESM1_ESM.pdf]

**Table S1:** Retinol concentrations in plasma (Lab Germany; DE;  $n = 132$ ) and serum (Lab Japan; JP;  $n = 61$ ) measured by HPLC and iCheck™ FLUORO.

| Lab DE   |                           |                              | Lab JP   |                           |                              |
|----------|---------------------------|------------------------------|----------|---------------------------|------------------------------|
| Sample # | HPLC<br>Retinol<br>(mg/L) | iCheck™<br>Retinol<br>(mg/L) | Sample # | HPLC<br>Retinol<br>(mg/L) | iCheck™<br>Retinol<br>(mg/L) |
| 1        | 0.279                     | 0.319                        | 1        | 0.043                     | 0.083                        |
| 2        | 0.281                     | 0.281                        | 2        | 0.066                     | 0.092                        |
| 3        | 0.274                     | 0.270                        | 3        | 0.089                     | 0.106                        |
| 4        | 0.311                     | 0.308                        | 4        | 0.089                     | 0.129                        |
| 5        | 0.377                     | 0.361                        | 5        | 0.099                     | 0.149                        |
| 6        | 0.311                     | 0.351                        | 6        | 0.099                     | 0.145                        |
| 7        | 0.307                     | 0.294                        | 7        | 0.109                     | 0.142                        |
| 8        | 0.431                     | 0.417                        | 8        | 0.109                     | 0.142                        |
| 9        | 0.335                     | 0.319                        | 9        | 0.122                     | 0.162                        |
| 10       | 0.333                     | 0.344                        | 10       | 0.122                     | 0.218                        |
| 11       | 0.315                     | 0.330                        | 11       | 0.122                     | 0.135                        |
| 12       | 0.288                     | 0.295                        | 12       | 0.122                     | 0.162                        |
| 13       | 0.203                     | 0.231                        | 13       | 0.132                     | 0.158                        |
| 14       | 0.338                     | 0.340                        | 14       | 0.132                     | 0.168                        |
| 15       | 0.340                     | 0.331                        | 15       | 0.142                     | 0.211                        |
| 16       | 0.301                     | 0.316                        | 16       | 0.142                     | 0.185                        |
| 17       | 0.285                     | 0.302                        | 17       | 0.155                     | 0.168                        |
| 18       | 0.383                     | 0.383                        | 18       | 0.165                     | 0.205                        |
| 19       | 0.362                     | 0.338                        | 19       | 0.165                     | 0.215                        |
| 20       | 0.376                     | 0.388                        | 20       | 0.188                     | 0.218                        |
| 21       | 0.415                     | 0.412                        | 21       | 0.188                     | 0.208                        |
| 22       | 0.284                     | 0.301                        | 22       | 0.198                     | 0.208                        |
| 23       | 0.294                     | 0.298                        | 23       | 0.198                     | 0.215                        |
| 24       | 0.281                     | 0.298                        | 24       | 0.208                     | 0.241                        |
| 25       | 0.377                     | 0.366                        | 25       | 0.231                     | 0.261                        |
| 26       | 0.299                     | 0.309                        | 26       | 0.231                     | 0.281                        |
| 27       | 0.239                     | 0.265                        | 27       | 0.241                     | 0.267                        |
| 28       | 0.280                     | 0.314                        | 28       | 0.241                     | 0.198                        |
| 29       | 0.301                     | 0.301                        | 29       | 0.241                     | 0.221                        |
| 30       | 0.322                     | 0.328                        | 30       | 0.254                     | 0.281                        |
| 31       | 0.340                     | 0.312                        | 31       | 0.254                     | 0.244                        |
| 32       | 0.375                     | 0.338                        | 32       | 0.287                     | 0.277                        |
| 33       | 0.331                     | 0.361                        | 33       | 0.287                     | 0.244                        |
| 34       | 0.292                     | 0.379                        | 34       | 0.297                     | 0.297                        |
| 35       | 0.360                     | 0.390                        | 35       | 0.297                     | 0.261                        |
| 36       | 0.329                     | 0.315                        | 36       | 0.297                     | 0.290                        |
| 37       | 0.327                     | 0.376                        | 37       | 0.297                     | 0.320                        |
| 38       | 0.319                     | 0.315                        | 38       | 0.297                     | 0.251                        |
| 39       | 0.286                     | 0.339                        | 39       | 0.307                     | 0.290                        |

|    |       |       |    |       |       |
|----|-------|-------|----|-------|-------|
| 40 | 0.363 | 0.339 | 40 | 0.307 | 0.264 |
| 41 | 0.345 | 0.423 | 41 | 0.307 | 0.267 |
| 42 | 0.303 | 0.298 | 42 | 0.320 | 0.244 |
| 43 | 0.323 | 0.371 | 43 | 0.320 | 0.274 |
| 44 | 0.357 | 0.320 | 44 | 0.320 | 0.333 |
| 45 | 0.348 | 0.431 | 45 | 0.320 | 0.327 |
| 46 | 0.431 | 0.406 | 46 | 0.320 | 0.297 |
| 47 | 0.257 | 0.268 | 47 | 0.320 | 0.284 |
| 48 | 0.373 | 0.375 | 48 | 0.330 | 0.254 |
| 49 | 0.358 | 0.344 | 49 | 0.330 | 0.310 |
| 50 | 0.420 | 0.382 | 50 | 0.330 | 0.366 |
| 51 | 0.313 | 0.329 | 51 | 0.340 | 0.317 |
| 52 | 0.272 | 0.270 | 52 | 0.340 | 0.300 |
| 53 | 0.289 | 0.286 | 53 | 0.340 | 0.314 |
| 54 | 0.266 | 0.278 | 54 | 0.353 | 0.340 |
| 55 | 0.222 | 0.257 | 55 | 0.353 | 0.290 |
| 56 | 0.291 | 0.319 | 56 | 0.353 | 0.300 |
| 57 | 0.372 | 0.395 | 57 | 0.353 | 0.323 |
| 58 | 0.293 | 0.379 | 58 | 0.353 | 0.290 |
| 59 | 0.289 | 0.334 | 59 | 0.353 | 0.290 |
| 60 | 0.295 | 0.338 | 60 | 0.363 | 0.350 |
| 61 | 0.283 | 0.349 | 61 | 0.363 | 0.320 |
| 62 | 0.297 | 0.344 |    |       |       |
| 63 | 0.240 | 0.290 |    |       |       |
| 64 | 0.263 | 0.304 |    |       |       |
| 65 | 0.298 | 0.338 |    |       |       |
| 66 | 0.377 | 0.411 |    |       |       |
| 67 | 0.246 | 0.285 |    |       |       |
| 68 | 0.345 | 0.420 |    |       |       |
| 69 | 0.193 | 0.232 |    |       |       |
| 70 | 0.253 | 0.288 |    |       |       |
| 71 | 0.304 | 0.372 |    |       |       |
| 72 | 0.242 | 0.306 |    |       |       |
| 73 | 0.300 | 0.348 |    |       |       |
| 74 | 0.119 | 0.158 |    |       |       |
| 75 | 0.086 | 0.107 |    |       |       |
| 76 | 0.044 | 0.070 |    |       |       |
| 77 | 0.137 | 0.172 |    |       |       |
| 78 | 0.085 | 0.120 |    |       |       |
| 79 | 0.053 | 0.082 |    |       |       |
| 80 | 0.094 | 0.133 |    |       |       |
| 81 | 0.061 | 0.091 |    |       |       |
| 82 | 0.033 | 0.063 |    |       |       |
| 83 | 0.135 | 0.166 |    |       |       |
| 84 | 0.083 | 0.115 |    |       |       |
| 85 | 0.044 | 0.080 |    |       |       |
| 86 | 0.118 | 0.139 |    |       |       |
| 87 | 0.075 | 0.102 |    |       |       |
| 88 | 0.037 | 0.069 |    |       |       |
| 89 | 0.198 | 0.232 |    |       |       |

|     |       |       |  |  |  |
|-----|-------|-------|--|--|--|
| 90  | 0.121 | 0.161 |  |  |  |
| 91  | 0.200 | 0.223 |  |  |  |
| 92  | 0.122 | 0.150 |  |  |  |
| 93  | 0.217 | 0.233 |  |  |  |
| 94  | 0.233 | 0.205 |  |  |  |
| 95  | 0.355 | 0.320 |  |  |  |
| 96  | 0.399 | 0.370 |  |  |  |
| 97  | 0.409 | 0.350 |  |  |  |
| 98  | 0.532 | 0.540 |  |  |  |
| 99  | 0.315 | 0.290 |  |  |  |
| 100 | 0.163 | 0.168 |  |  |  |
| 101 | 0.413 | 0.438 |  |  |  |
| 102 | 0.481 | 0.484 |  |  |  |
| 103 | 0.257 | 0.259 |  |  |  |
| 104 | 0.321 | 0.350 |  |  |  |
| 105 | 0.377 | 0.311 |  |  |  |
| 106 | 0.326 | 0.281 |  |  |  |
| 107 | 0.253 | 0.227 |  |  |  |
| 108 | 0.418 | 0.345 |  |  |  |
| 109 | 0.367 | 0.298 |  |  |  |
| 110 | 0.197 | 0.218 |  |  |  |
| 111 | 0.400 | 0.365 |  |  |  |
| 112 | 0.309 | 0.306 |  |  |  |
| 113 | 0.236 | 0.264 |  |  |  |
| 114 | 0.284 | 0.276 |  |  |  |
| 115 | 0.463 | 0.406 |  |  |  |
| 116 | 0.294 | 0.277 |  |  |  |
| 117 | 0.425 | 0.354 |  |  |  |
| 118 | 0.423 | 0.387 |  |  |  |
| 119 | 0.384 | 0.340 |  |  |  |
| 120 | 0.242 | 0.260 |  |  |  |
| 121 | 0.176 | 0.176 |  |  |  |
| 122 | 0.416 | 0.352 |  |  |  |
| 123 | 0.323 | 0.294 |  |  |  |
| 124 | 0.194 | 0.204 |  |  |  |
| 125 | 0.308 | 0.282 |  |  |  |
| 126 | 0.150 | 0.165 |  |  |  |
| 127 | 0.394 | 0.313 |  |  |  |
| 128 | 0.355 | 0.290 |  |  |  |
| 129 | 0.227 | 0.232 |  |  |  |
| 130 | 0.294 | 0.249 |  |  |  |
| 131 | 0.261 | 0.237 |  |  |  |
| 132 | 0.386 | 0.312 |  |  |  |
