# Supplementary material for: Validation of blood vitamin A concentrations in cattle: comparison of a new cow-side test (iCheck™ FLUORO) with high-performance liquid chromatography (HPLC)
Source: PubMed Central journal article supplement (PMC5424361; doi:10.1186/s12917-017-1042-3), 2017-05-10
Supplement: 12917_2017_1042_MOESM2_ESM.pdf [file 12917_2017_1042_MOESM2_ESM.pdf]

**Table S2:** Concentrations of retinol in plasma ( $n = 10$ ) measured by HPLC and iCheck™ FLUORO and whole blood measured by iCheck™ FLUORO.

| Sample # | HPLC                  | iCheck™               | iCheck™              |
|----------|-----------------------|-----------------------|----------------------|
|          | Plasma retinol (mg/L) | Plasma retinol (mg/L) | Blood retinol (mg/L) |
| 1        | 0.231                 | 0.244                 | 0.245                |
| 2        | 0.310                 | 0.327                 | 0.299                |
| 3        | 0.422                 | 0.404                 | 0.375                |
| 4        | 0.310                 | 0.300                 | 0.344                |
| 5        | 0.416                 | 0.377                 | 0.371                |
| 6        | 0.521                 | 0.451                 | 0.480                |
| 7        | 0.305                 | 0.304                 | 0.307                |
| 8        | 0.312                 | 0.294                 | 0.294                |
| 9        | 0.398                 | 0.394                 | 0.369                |
| 10       | 0.309                 | 0.307                 | 0.322                |
